# Supplementary material for: Association between the Infant and Child Feeding Index (ICFI) and nutritional status of 6- to 35-month-old children in rural western China
Source: PubMed Central journal article supplement (PMC5313129; doi:10.1371/journal.pone.0171984), 2017-02-16
Supplement: pone.0171984.s001.pdf [file pone.0171984.s001.pdf]

| Variables                          | Contents                                                                                   | Code                |
|------------------------------------|--------------------------------------------------------------------------------------------|---------------------|
| BD                                 | Survey Date: 2005 (year)_____(month)_____(day)                                             | 2005/_ _/_ _        |
| <b>Demographic characteristics</b> |                                                                                            |                     |
| B1                                 | Family size:_____                                                                          | __ __               |
| B2                                 | Parity:_____                                                                               | __                  |
| B3                                 | Mother's race:_____                                                                        |                     |
| B4                                 | Mother's birth date: _ _ _ _ / _ _ / _ _                                                   | _ _ _ _ / _ _ / _ _ |
| B5                                 | Mother's educational period:_____year                                                      | __ __               |
| B6                                 | Father's educational period:_____year                                                      | __ __               |
| B7                                 | Water source:_____                                                                         |                     |
| B8                                 | Household Income:_____                                                                     |                     |
| B9                                 | Household Television Sets: (1) none (2) black and white (3) color                          | __                  |
| B10                                | Household Vehicles: (1) none (2) bicycle (3) motorcycle (4) tractor or car (5) others_____ | __                  |
| <b>Feeding</b>                     |                                                                                            |                     |
| B11                                | Child birth date: _ _ _ _ / _ _ / _ _                                                      | _ _ _ _ / _ _ / _ _ |
| B12                                | Child sex: (1) boy (2) girl                                                                | __                  |
| B13                                | Breastfeeding: (1) yes (2) no                                                              | __                  |
| B14                                | When was your child weaned:_____month                                                      | __ __               |
| B15                                | When did the child begin to drink water:_____month                                         | __ __               |
| B16a                               | When did the child begin to add grains:_____month                                          | __ __               |
| B16b                               | If adding, adding frequency:<br>(1) $\leq 1$ time/month                                    | __                  |

|      |                                                                                                                                                              |     |
|------|--------------------------------------------------------------------------------------------------------------------------------------------------------------|-----|
|      | (2) 1 time/month<br>(3) 2-3 times/month<br>(4) 1 time/week<br>(5) 2-3 times/week<br>(6) Every day                                                            |     |
| B17a | When did the child begin to add egg: _____ month                                                                                                             | — — |
| B17b | If adding, adding frequency:<br>(1) $\leq$ 1 time/month<br>(2) 1 time/month<br>(3) 2-3 times/month<br>(4) 1 time/week<br>(5) 2-3 times/week<br>(6) Every day | —   |
| B18a | When did the child begin to add fresh milk:<br>_____ month                                                                                                   | — — |
| B18b | If adding, adding frequency:<br>(1) $\leq$ 1 time/month<br>(2) 1 time/month<br>(3) 2-3 times/month<br>(4) 1 time/week<br>(5) 2-3 times/week<br>(6) Every day | —   |
| B19a | When did the child begin to add fresh milk powder:<br>_____ month                                                                                            | — — |
| B19b | If adding, adding frequency:<br>(1) $\leq$ 1 time/month<br>(2) 1 time/month<br>(3) 2-3 times/month<br>(4) 1 time/week<br>(5) 2-3 times/week<br>(6) Every day | —   |
| B20a | When did the child begin to add formula:<br>_____ month                                                                                                      | — — |

|      |                                                                                                                                                                                                        |     |
|------|--------------------------------------------------------------------------------------------------------------------------------------------------------------------------------------------------------|-----|
| B20b | <p>If adding, adding frequency:</p> <p>(1) <math>\leq 1</math> time/month</p> <p>(2) 1 time/month</p> <p>(3) 2-3 times/month</p> <p>(4) 1 time/week</p> <p>(5) 2-3 times/week</p> <p>(6) Every day</p> |     |
| B21a | <p>When did the child begin to add bean products:<br/>_____ month</p>                                                                                                                                  | — — |
| B21b | <p>If adding, adding frequency:</p> <p>(1) <math>\leq 1</math> time/month</p> <p>(2) 1 time/month</p> <p>(3) 2-3 times/month</p> <p>(4) 1 time/week</p> <p>(5) 2-3 times/week</p> <p>(6) Every day</p> | —   |
| B22a | <p>When did the child begin to add fish:_____ month</p>                                                                                                                                                | — — |
| B22b | <p>If adding, adding frequency:</p> <p>(1) <math>\leq 1</math> time/month</p> <p>(2) 1 time/month</p> <p>(3) 2-3 times/month</p> <p>(4) 1 time/week</p> <p>(5) 2-3 times/week</p> <p>(6) Every day</p> | —   |
| B23a | <p>When did the child begin to add meat (beef, mutton and pork):_____ month</p>                                                                                                                        | — — |
| B23b | <p>If adding, adding frequency:</p> <p>(1) <math>\leq 1</math> time/month</p> <p>(2) 1 time/month</p> <p>(3) 2-3 times/month</p> <p>(4) 1 time/week</p> <p>(5) 2-3 times/week</p> <p>(6) Every day</p> | —   |
| B24a | <p>When did the child begin to add fruits and vegetables:</p>                                                                                                                                          |     |

|                     |                                                                                                                                                                                                                           |                     |
|---------------------|---------------------------------------------------------------------------------------------------------------------------------------------------------------------------------------------------------------------------|---------------------|
| B24b                | <p>_____ month</p> <p>If adding, adding frequency:</p> <p>(1) <math>\leq 1</math> time/month</p> <p>(2) 1 time/month</p> <p>(3) 2-3 times/month</p> <p>(4) 1 time/week</p> <p>(5) 2-3 times/week</p> <p>(6) Every day</p> | <p>— —</p> <p>—</p> |
| Anthropometric data |                                                                                                                                                                                                                           |                     |
| B25                 | Mother's height _____ .__ cm                                                                                                                                                                                              | _____ .__           |
| B26                 | Total weight of mother and child _____ .__ kg                                                                                                                                                                             | _____ .__           |
| B27                 | Mother's weight _____ .__ kg                                                                                                                                                                                              | _____ .__           |
| B28                 | Child's weight _____ .__ kg                                                                                                                                                                                               | _____ .__           |
| B29                 | Child's length _____ .__ cm                                                                                                                                                                                               | _____ .__           |
